# Supplementary material for: First-principles calculations of the BeO monolayer with chemical functionalization
Source: Royal Society of Chemistry journal article supplement (doi:10.1039/d1cp05640a), 2022-01-01
Supplement: d1cp05640a1.pdf [file d1cp05640a1.pdf]

# Supplementary Material for First- principles calculations of BeO monolayer with chemical functionalization

Hanlu Liu, Kehan Feng, Haiming Lu\*, Xiangkang Meng

*College of Engineering and Applied Sciences, Jiangsu Key Laboratory of  
Artificial Functional Materials, Collaborative Innovation Center of  
Advanced Microstructures, Nanjing University, Nanjing 210093, China*

*\* Correspondence: [haimlu@nju.edu.cn](mailto:haimlu@nju.edu.cn)(H.Lu)*

---

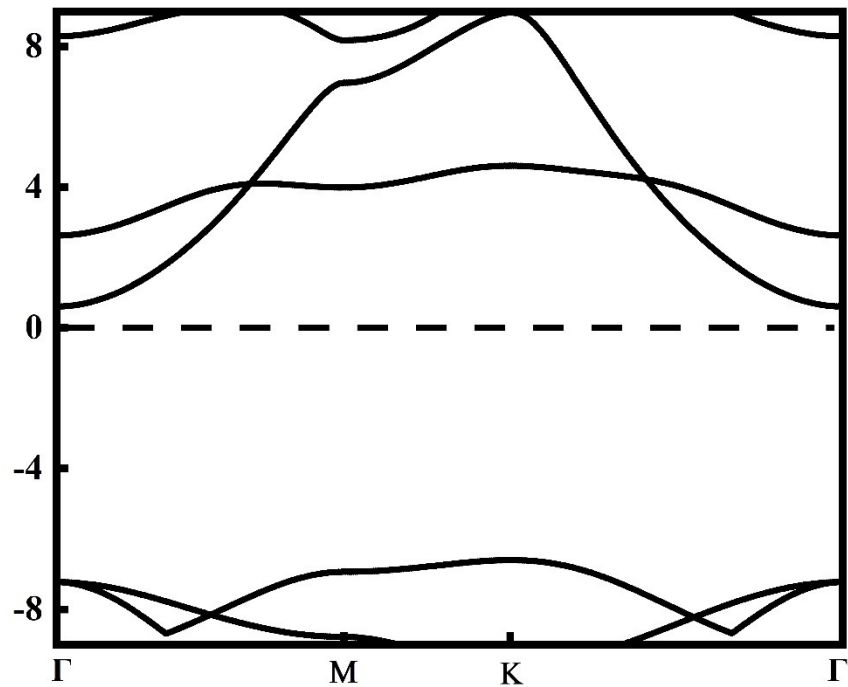

Fig. S1. Band structure of BeO monolayer by the hybrid functional HSE06.

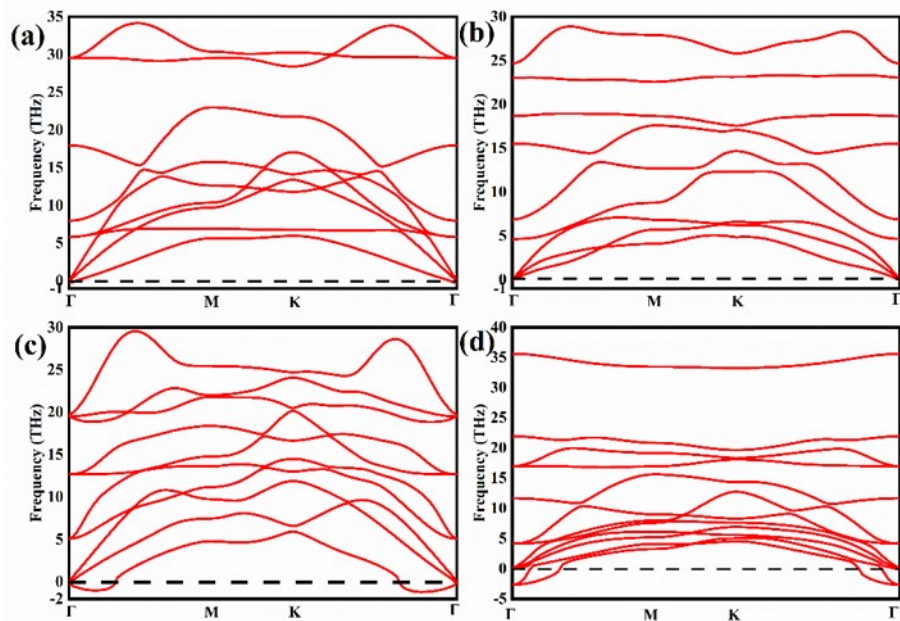

Fig. S2. The phonon spectrums of the most stable adsorption configurations for (a) half-hydrogenation, (b) half-fluorination, (c) full-hydrogenation, and (d) full-fluorination.

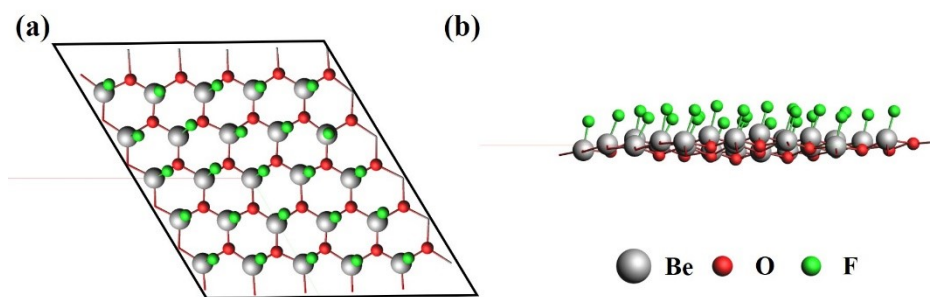

Fig. S3. Top (a) and side (b) views of AIMD simulation results for  $5 \times 5$  BeO supercell after the half-fluorination at  $T_B$ .

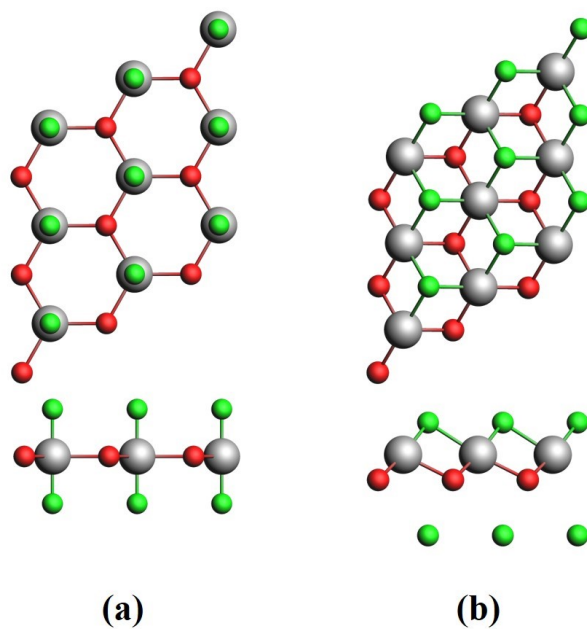

Fig. S4. Top and side views of optimized BeO monolayer after full-fluorination at (a)  $T_{Be2}$  and (b)  $T_{C2}$  sites.
